# Supplementary material for: Linear not cyclic – unravelling an anionic initiation pathway for Lewis pair polymerization of lactones
Source: Royal Society of Chemistry journal article supplement (doi:10.1039/d3py00310h), 2023-01-01
Supplement: d3py00310h1.pdf [file d3py00310h1.pdf]

# Supporting Information

## Linear not Cyclic – Unravelling an Anionic Initiation Pathway for Lewis Pair Polymerization of Lactones

Vincent Nieboer,<sup>1</sup> Noé Fanjul-Mosteirín,<sup>2</sup> Peter Olsén,<sup>2\*</sup> and Karin Odelius<sup>2\*</sup>

<sup>1</sup>Department of Fibre and Polymer Technology, KTH Royal Institute of Technology, SE-100 44, Stockholm, Sweden

<sup>2</sup>Wallenberg Wood Science Center, WWSC, Department of Fibre and Polymer Technology, KTH Royal Institute of Technology, SE-100 44, Stockholm, Sweden

\*Corresponding authors: Peter Olsén, [polsen@kth.se](mailto:polsen@kth.se) and Karin Odelius, [hoem@kth.se](mailto:hoem@kth.se)

## Table of Contents

|                                                                                                             |    |
|-------------------------------------------------------------------------------------------------------------|----|
| Methods .....                                                                                               | 3  |
| Materials and reagents .....                                                                                | 3  |
| Instrumentation and characterization .....                                                                  | 3  |
| Synthesis of PPDL by ZnEt <sub>2</sub> -DBU .....                                                           | 4  |
| Polymerization kinetics.....                                                                                | 5  |
| Preparation of the ZnEt <sub>2</sub> treated PDL FT-IR samples .....                                        | 5  |
| Supporting data.....                                                                                        | 6  |
| Table S1. Control polymerization reactions. ....                                                            | 6  |
| Figure S1. <sup>1</sup> H and <sup>13</sup> C NMR analysis of high molecular weight PPDL.....               | 6  |
| Figure S2. MALDI-TOF MS analysis of low molecular weight PCL.....                                           | 7  |
| Figure S3. NMR tube preparation method to record <i>in-situ</i> NMR spectra.....                            | 7  |
| Figure S4. <i>In-situ</i> <sup>1</sup> H NMR of δVL treated with ZnEt <sub>2</sub> -DBU Lewis Pair .....    | 7  |
| Figure S5. <i>In-situ</i> <sup>1</sup> H NMR of γBL treated with ZnEt <sub>2</sub> -DBU Lewis Pair.....     | 8  |
| Figure S6. <i>In-situ</i> <sup>1</sup> H NMR of εCL treated with ZnEt <sub>2</sub> -DBU Lewis Pair.....     | 8  |
| Figure S7. FT-IR analysis of ZnEt <sub>2</sub> treated PDL.....                                             | 9  |
| Figure S8. <i>In-situ</i> <sup>1</sup> H NMR of ZnEt <sub>2</sub> -DBU adduct. ....                         | 10 |
| Figure S9. Hypothesised reaction mechanism for ZnEt <sub>2</sub> -DBU initiated polymerization of PDL. .... | 10 |
| Figure S10. <sup>1</sup> H NMR of PPDL synthesized by ZnEt <sub>2</sub> -DBU in toluene at 120 °C.....      | 11 |
| Figure S11. HSQC NMR spectroscopy of PPDL synthesized at 120 °C. ....                                       | 12 |
| Figure S12. HMBC NMR spectroscopy of PPDL synthesized at 120 °C. ....                                       | 13 |
| Figure S13. COSY NMR spectroscopy of PPDL synthesized at 120 °C. ....                                       | 14 |
| Figure S14. <sup>1</sup> H NMR of PCL synthesized by ZnEt <sub>2</sub> in the absence of DBU. ....          | 15 |
| Table S2. Specifications for polymers used for viscometry. ....                                             | 15 |
| Figure S15. Viscosity of PPDL with number average molecular weight.....                                     | 16 |
| Figure S16. <i>In-situ</i> <sup>13</sup> C NMR of δVL treated with ZnEt <sub>2</sub> -DBU Lewis Pair .....  | 17 |
| Figure S17. <i>In-situ</i> <sup>13</sup> C NMR of γBL treated with ZnEt <sub>2</sub> -DBU Lewis Pair.....   | 17 |
| Figure S18. <sup>13</sup> C NMR of P(δVL) synthesized with ZnEt <sub>2</sub> -DBU Lewis Pair.....           | 18 |
| Figure S19. SEC analysis of P(δVL) synthesized with ZnEt <sub>2</sub> -DBU Lewis Pair.....                  | 18 |
| Figure S20. <sup>1</sup> H NMR of P(δVL) synthesized with ZnEt <sub>2</sub> -DBU Lewis Pair.....            | 18 |
| Figure S21. SEC analysis of PPDL synthesized using various ratios of ZnEt <sub>2</sub> to DBU .....         | 19 |
| Figure S22. End group analysis of PPDL synthesized with γBL-ZnEt <sub>2</sub> -DBU initiation system.....   | 20 |
| Figure S23. SEC analysis of P(εCL) synthesized using ZnEt <sub>2</sub> -DBU Lewis Pair. ....                | 20 |

# Methods

## Materials and reagents

The manipulation of all air or moisture sensitive reagents was performed inside a N<sub>2</sub>-filled glovebox. All glassware and stirring bars were oven dried prior to use, unless otherwise mentioned. Purification of  $\delta$ -valerolactone ( $\delta$ VL),  $\gamma$ -butyrolactone ( $\gamma$ BL), and  $\epsilon$ -caprolactone ( $\epsilon$ CL) (99%, Sigma-Aldrich) was performed by drying over CaH<sub>2</sub> (93%, Thermo Scientific) for 18 hours, followed by vacuum distillation. The distillate was stored inside a glovebox over activated molecular sieves (4 Å). Pentadecalactone (PDL) (98%, Sigma-Aldrich) was dried over P<sub>2</sub>O<sub>5</sub> for at least 7 days prior to use. 1,8-diazabicyclo[5.4.0]undec-7-ene (DBU) (>99%, Sigma-Aldrich), diethyl zinc 15 wt.% in toluene (Sigma-Aldrich), and anhydrous toluene (99%, Sigma-Aldrich) were stored under nitrogen atmosphere and used without further purification. HCl 2 M in anhydrous Et<sub>2</sub>O (99%, Sigma-Aldrich) was stored at 11 °C, trans-2-[3-(4-tert-butylphenyl)-2-methyl-2-propenylidene] malononitrile (>99%, Sigma-Aldrich) was stored in a desiccator over activated alumina, and NaOTf (98%, Sigma-Aldrich) and tetrahydrofuran (THF) (inhibitor free, >99%, Sigma Aldrich) were stored under ambient conditions and used without further purification.

## Instrumentation and characterization

### *Nuclear magnetic resonance (NMR)*

<sup>1</sup>H, <sup>13</sup>C, <sup>1</sup>H-<sup>1</sup>H correlation, and <sup>1</sup>H-<sup>13</sup>C correlation NMR spectra were recorded in CDCl<sub>3</sub> on a 400 MHz Bruker Avance III HD instrument at room temperature. Chemical shifts are reported in parts per million (ppm) and referenced to the residual solvent signal (CHCl<sub>3</sub>: <sup>1</sup>H,  $\delta$  = 7.26 ppm, <sup>13</sup>C,  $\delta$  = 77.2 ppm). <sup>1</sup>H NMR spectra recorded in toluene were referenced to the methyl group of toluene (CH<sub>3</sub> toluene: 2.36 ppm).

### *Size exclusion chromatography (SEC)*

SEC elugrams were obtained on a Malvern GPCMAX instrument containing a PLgel 5  $\mu$ m guard column (7.5 x 50 mm) and two PLgel 5  $\mu$ m MIXED-D (300 x 7.5 mm) columns. HPLC grade CHCl<sub>3</sub> containing 2% (v/v) toluene was used as eluent at 35 °C. Polystyrene standards with a narrow dispersity

(162-364,000 g mol<sup>-1</sup>) were used as calibration. Samples were prepared at ~3 mg mL<sup>-1</sup> for a 100 µL injection volume.

#### *Matrix assisted laser desorption/ionization time of flight mass spectroscopy (MALDI TOF MS)*

MALDI TOF MS spectra were recorded on an ultrafleXtreme MALDI TOF/TOF with a smartbeam-II laser operating at a wavelength of 355 nm (Bruker Daltonik), controlled by FlexControl software (Bruker Daltonik). Sample preparation was performed as follows: low molecular weight polymer was dissolved in chloroform (5 mg mL<sup>-1</sup>), trans-2-[3-(4-tert-butylphenyl)-2-methyl-2-propenylidene] malononitrile matrix was dissolved in THF (100 mg mL<sup>-1</sup>), and NaOTf was dissolved in THF (10 mg mL<sup>-1</sup>). These 3 solutions were then mixed as: 40 µL polymer, 10 µL NaOTf, and 60 µL matrix. The resulting solution was spotted on stainless steel MALDI target plate and left to dry.

#### *Fourier-transform infrared spectroscopy (FT-IR)*

FT-IR spectra were recorded in the 600–4000 cm<sup>-1</sup> region for 16 scans on a Perkin-Elmer spotlight 400 FT-IR system equipped with a MKII heated Diamond 45° ATR Top Plate crystal.

#### *Viscometry*

Viscometry was performed on a Lauda iVisc Viscosimeter (Version 1.01) equipped with an Ubbelohde type viscometer at a capillary constant of 0.009582 mm<sup>2</sup> s<sup>-2</sup>. Polymer samples were dissolved at a concentration of 0.1 g mL<sup>-1</sup> in CHCl<sub>3</sub> and loaded using a glass pipette. The Hagenbach kinetic energy correction was employed for the analysis of a statistical significance samples (p<0.005) consisting of 5 repetitions.

#### **Synthesis of PPDL by ZnEt<sub>2</sub>-DBU**

A typical polymerization procedure was as follows: an oven-dried glass vial was charged with PDL (1 g, 4.16 mmol, 50 equiv.), dissolved in anhydrous toluene (2.08 mL, 1.80 g), and treated with ZnEt<sub>2</sub> 15 wt.% in toluene (68.5 mg, 0.083 mmol, 1 equiv.) and DBU (25.3 mg, 0.166 mmol, 2 equiv.). The vial was equipped with a septum and quickly transferred out of the glovebox onto a preheated sand bath at 90 °C for polymerization and determination of kinetics. After a determined time, HCl (2 M) in

anhydrous Et<sub>2</sub>O (208 μL, 0.416 mmol, 5 equiv.) was added to the reaction vial to stop the reaction, the polymers were isolated by precipitation from cold MeOH and dried for 24 hours *in vacuo* to yield a white fluffy solid. Typical yield = 0.96 g (96%). <sup>1</sup>H NMR (400 MHz, CDCl<sub>3</sub>) δ 4.05 (t, *J* = 6.7 Hz, 2H), 2.28 (t, *J* = 7.6 Hz, 2H), 1.61 (m, 4H), 1.37 – 1.23 (m, 20H). <sup>13</sup>C NMR (101 MHz, CDCl<sub>3</sub>) δ 174.1, 77.3, 64.5, 34.5, 29.8, 29.7, 29.7, 29.7, 29.6, 29.4, 29.4, 29.3, 28.8, 26.1, 25.2.

### Polymerization kinetics

To monitor the polymerization rate of PDL, samples were withdrawn from the crude mixture during polymerization for <sup>1</sup>H NMR spectroscopy and SEC analysis. Initially, samples were obtained through the septum using clean needles and syringes. As the solution turned too viscous, the reaction vials were decapped under a flow of nitrogen, where oven dried glass pipettes were used to draw samples. The drawn samples were quenched by dissolution in cold undried CHCl<sub>3</sub> or CDCl<sub>3</sub>. <sup>1</sup>H NMR analysis was performed immediately after sample preparation in the deuterated solvent and conversion was determined by comparative integration of the methylene peaks of the monomer (PDL δ = 4.14 ppm, εCL δ = 4.26, δVL δ = 3.63) and polymer (PPDL δ = 4.06 ppm, P(εCL) δ = 4.06, P(δVL) δ = 3.88).

For δVL, γBL, and εCL, kinetics were monitored by in-situ <sup>1</sup>H NMR analysis at room temperature.

### Preparation of the ZnEt<sub>2</sub> treated PDL FT-IR samples

An oven dried glass vial was charged with PDL (94 mg, 0.391 mmol, 1 equiv.), DBU (53 mg, 0.391 mmol, 1 equiv.), and ZnEt<sub>2</sub> 15 wt% in toluene (288 mg, 0.391 mmol, 1 equiv.). The vial was capped and the solution transferred outside the glovebox onto a preheated sand bath at 120 °C, where the solution was left for 2 hours. During this time, the solution solidified to form a yellow/orange clear solid. FT-IR analysis was performed directly on this solid.

In the case where the FT-IR product were quenched, HCl (2 M) in Et<sub>2</sub>O (200 μL) was added and the solution was stirred mechanically with a glass pipette until a white dispersion was obtained. The solvent was then removed *in vacuo* to yield a white powder. FT-IR analysis were performed directly on the white powder.

## Supporting data

Table S1. Polymerization reactions of ZnEt<sub>2</sub> or DBU with CL or PDL at different temperatures. Monomer concentration = 2 M with [monomer]/[ZnEt<sub>2</sub> or DBU] = 50/1.

| Entry | Solution                        | Reaction time (h) | Reaction temperature (°C) | Conversion (%) <sup>a</sup> |
|-------|---------------------------------|-------------------|---------------------------|-----------------------------|
| 1     | ZnEt <sub>2</sub> + CL          | 6                 | 120                       | 99                          |
| 2     | ZnEt <sub>2</sub> + CL          | 9                 | 90                        | 98                          |
| 3     | ZnEt <sub>2</sub> + PDL         | 4                 | 120                       | 0                           |
| 4     | DBU + CL                        | 6                 | 120                       | 0                           |
| 5     | DBU + PDL                       | 6                 | 120                       | 0                           |
| 6     | ZnEt <sub>2</sub> + 2 DBU + PDL | 6                 | 22                        | 0                           |

<sup>a</sup> determined by <sup>1</sup>H NMR of the crude sample.

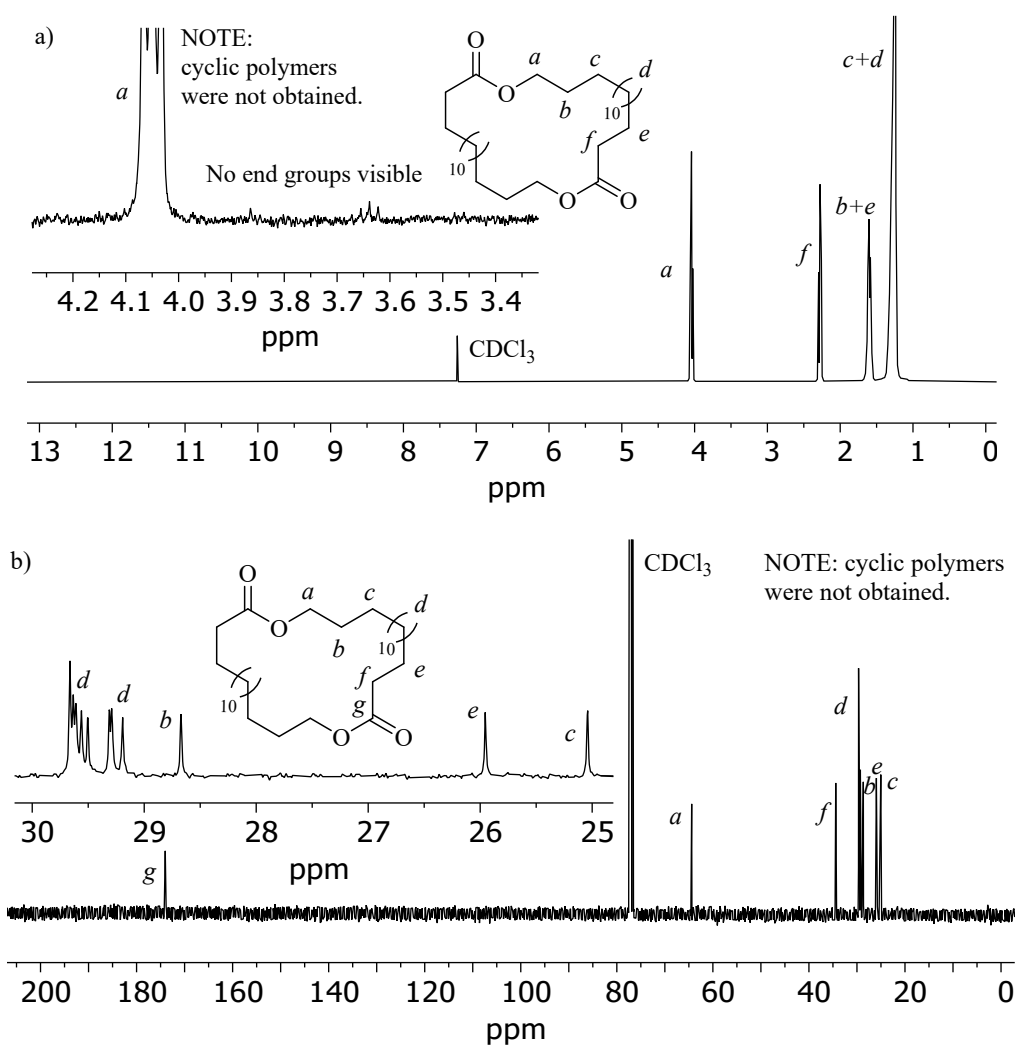

Figure S1. Analysis of PPDL synthesized by  $\text{ZnEt}_2$ -DBU Lewis pair at  $90^\circ\text{C}$  in toluene. a)  $^1\text{H}$  NMR (400 MHz, 298 K,  $\text{CDCl}_3$ ). b)  $^{13}\text{C}$  NMR (101 MHz, 298 K,  $\text{CDCl}_3$ ). End-groups of high molecular weight polymers are not visible, which may be interpreted as cyclic polymer.

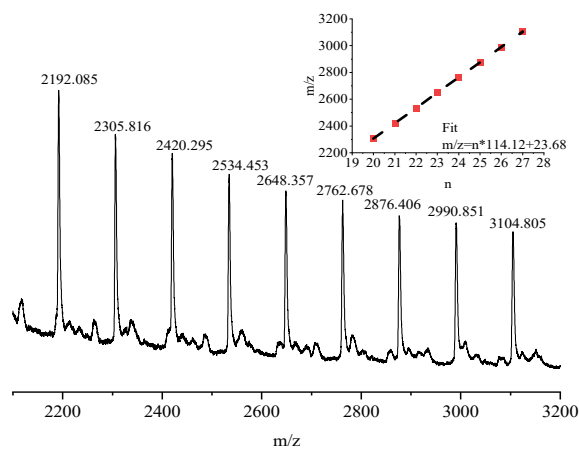

Figure S2. MALDI-TOF MS analysis of low molecular weight PCL synthesized at  $90^\circ\text{C}$  in toluene using  $[\text{CL}]_0 = 1.5\text{ M}$  and  $[\text{CL}]/[\text{ZnEt}_2] = 25/1$ . Reaction was terminated using  $\text{HCl}$  in anhydrous  $\text{Et}_2\text{O}$ .

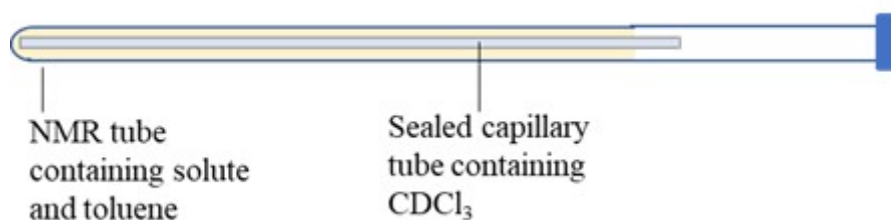

Figure S3. NMR tube preparation method to record  $^1\text{H}$  NMR spectra in toluene.

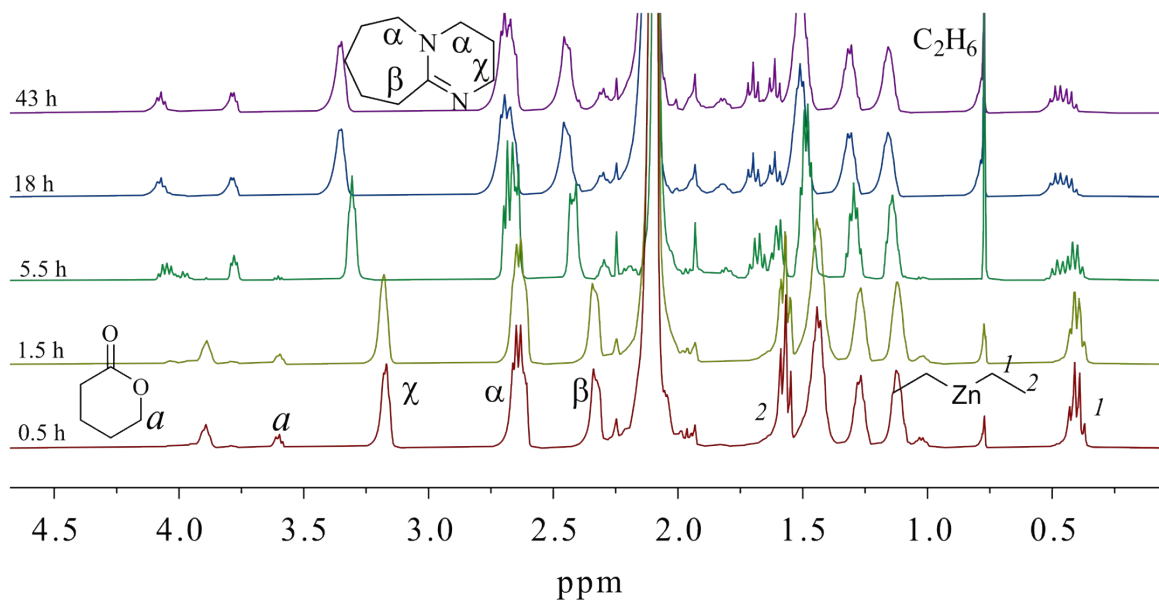

Figure S4. In-situ  $^1\text{H}$  NMR (298 K, 400 MHz, toluene) of a solution of  $[\delta\text{VL}]/[\text{ZnEt}_2]/[\text{DBU}] = 1/1/2$  in toluene at room temperature with spectra recorded over time.

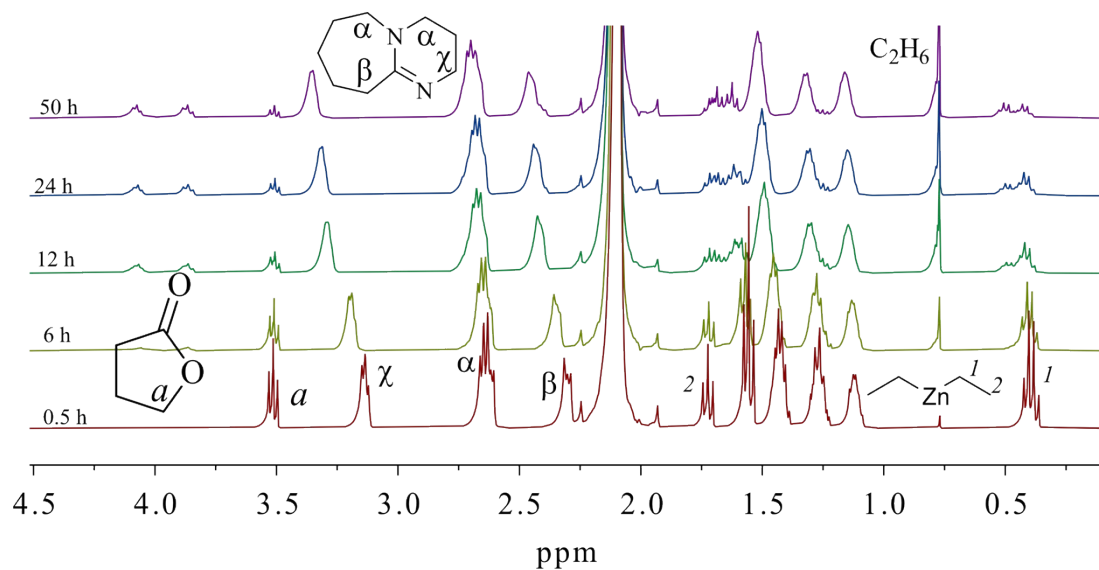

Figure S5. In-situ  $^1\text{H}$  NMR (298 K, 400 MHz, toluene) of a solution of  $[\gamma\text{BL}]/[\text{ZnEt}_2]/[\text{DBU}] = 1/1/2$  in toluene at room temperature with spectra recorded over time.

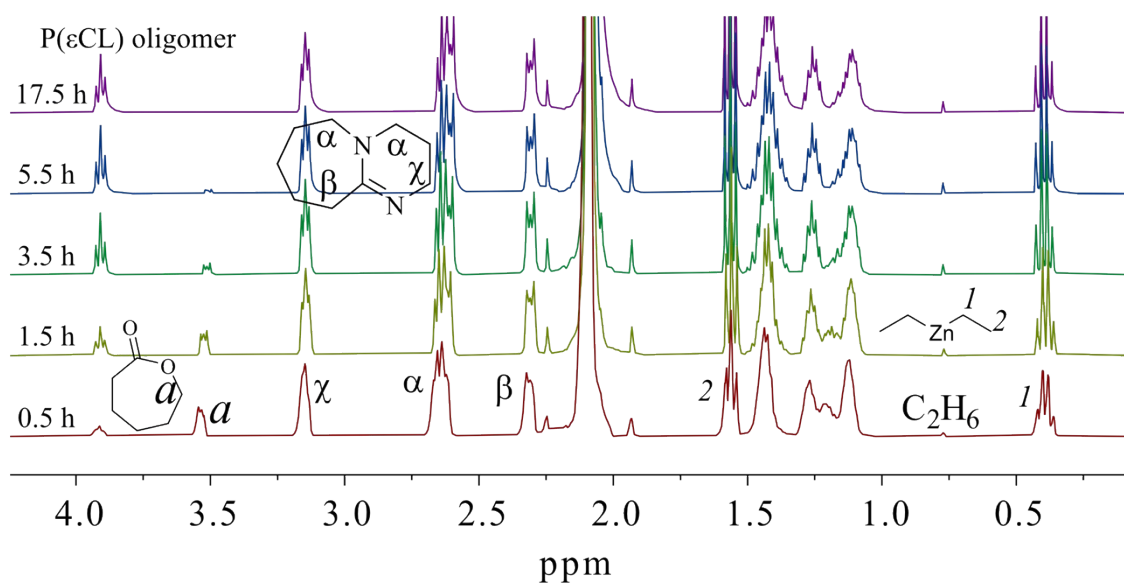

Figure S6. In-situ  $^1\text{H}$  NMR (298 K, 400 MHz, toluene) of a solution of  $[\text{CL}]/[\text{ZnEt}_2]/[\text{DBU}] = 1/1/2$  in toluene at room temperature with spectra recorded over time.



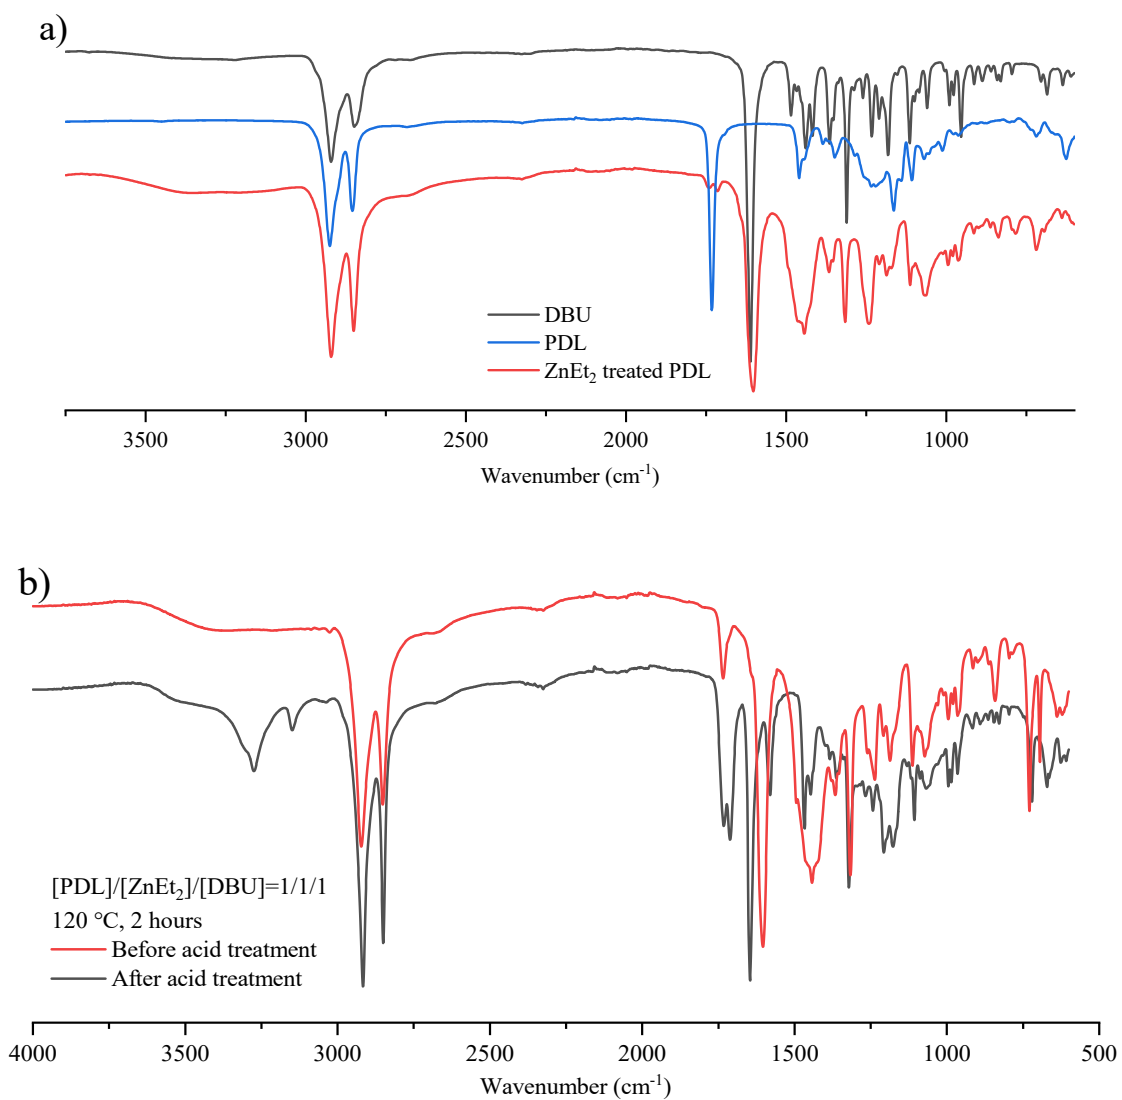

Figure S7. FT-IR spectra of DBU, PDL, and reaction product of [PDL]/[ZnEt<sub>2</sub>]/[DBU] = 1/1/1 heated to 120 °C in bulk for 2 h. a) compared to DBU and PDL and b) compared to acid treated reaction product.

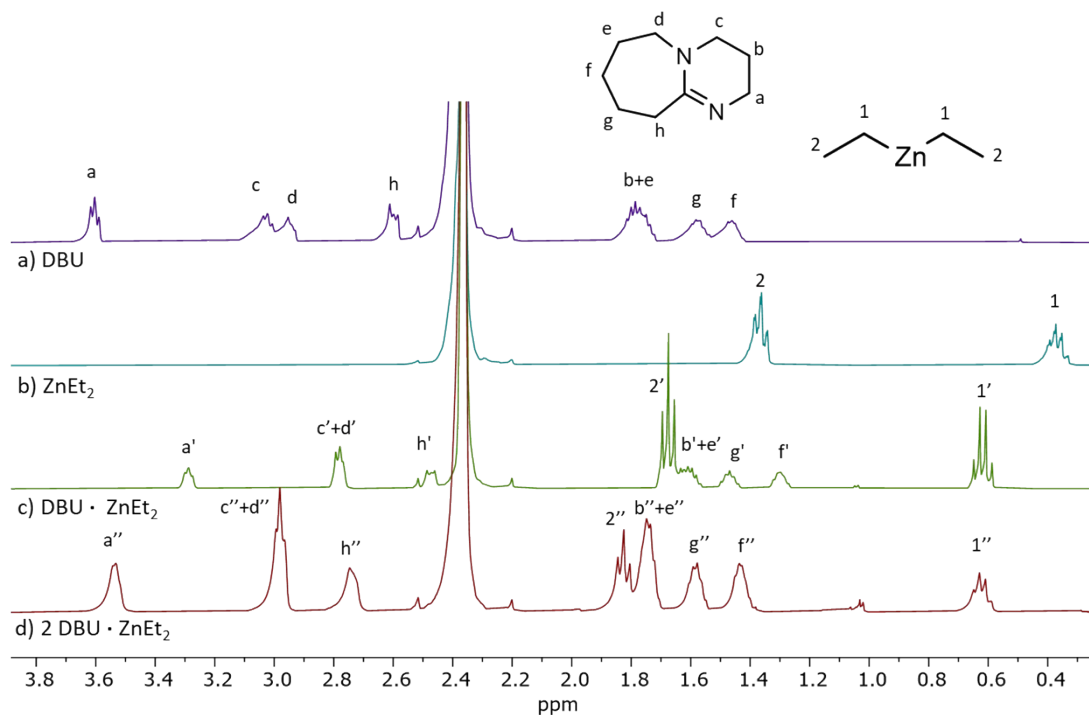

Figure S8.  $^1\text{H}$  NMR (400 MHz, 298 K,  $\text{CDCl}_3$ ) recorded in toluene containing a sealed capillary tube containing  $\text{CDCl}_3$  present in the NMR tube as schematically drawn in Figure S3. Recorded spectra: a) DBU, b)  $\text{ZnEt}_2$ , c)  $\text{DBU} \cdot \text{ZnEt}_2$  adduct, and d)  $2 \text{ DBU} \cdot \text{ZnEt}_2$  adduct. Ingredients were mixed and no additional heating was required. The large peak at 2.36 ppm is from the toluene.

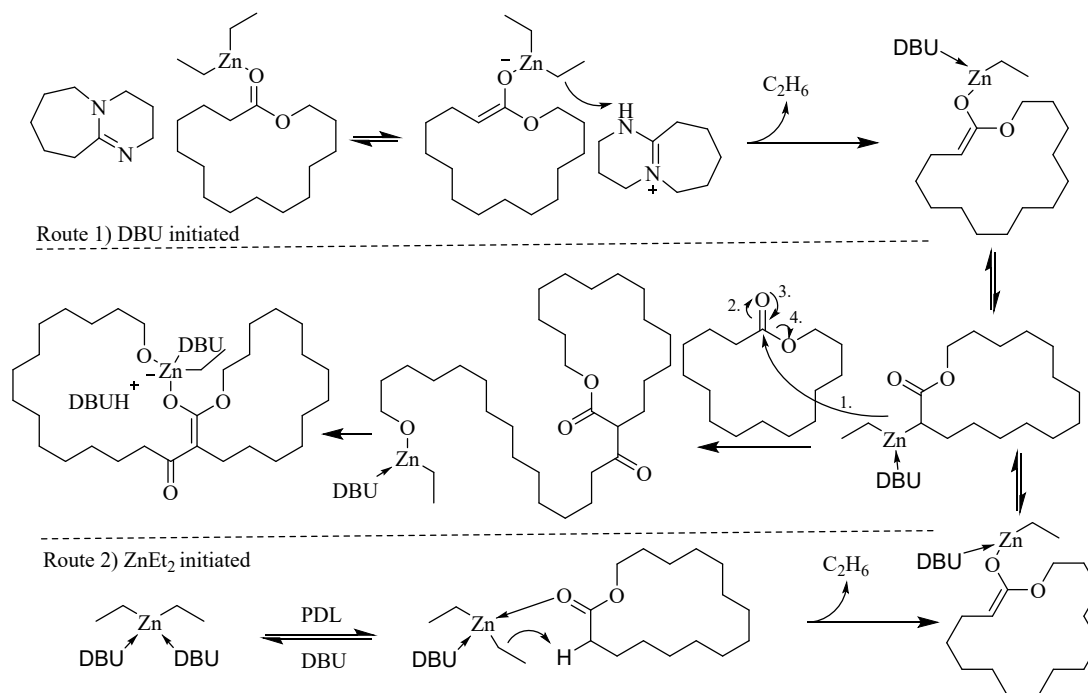

Figure S9. Hypothesised reaction mechanisms for  $\text{ZnEt}_2$ -DBU polymerization of PDL.

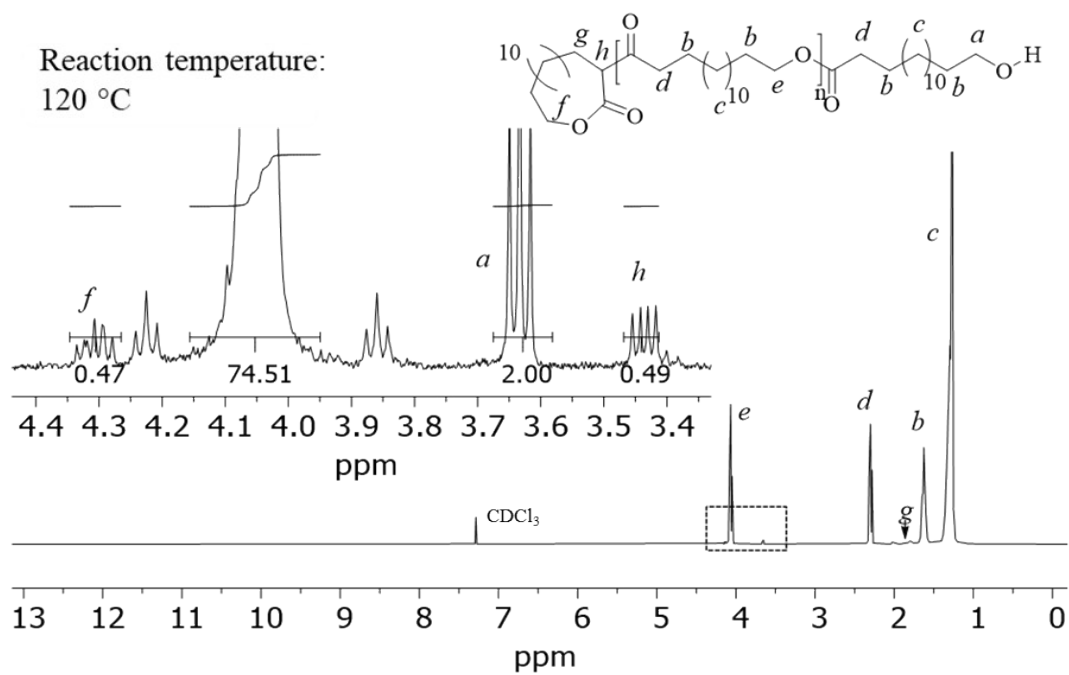

Figure S10. Typical <sup>1</sup>H NMR of PPDL polymer synthesized by [PDL]/[ZnEt<sub>2</sub>]/[DBU] = 25/1/2 in toluene at 120 °C and [PDL]<sub>0</sub> = 2 M. Isolated from precipitation in methanol and recorded in CDCl<sub>3</sub> (400 MHz, 298 K, CDCl<sub>3</sub>).

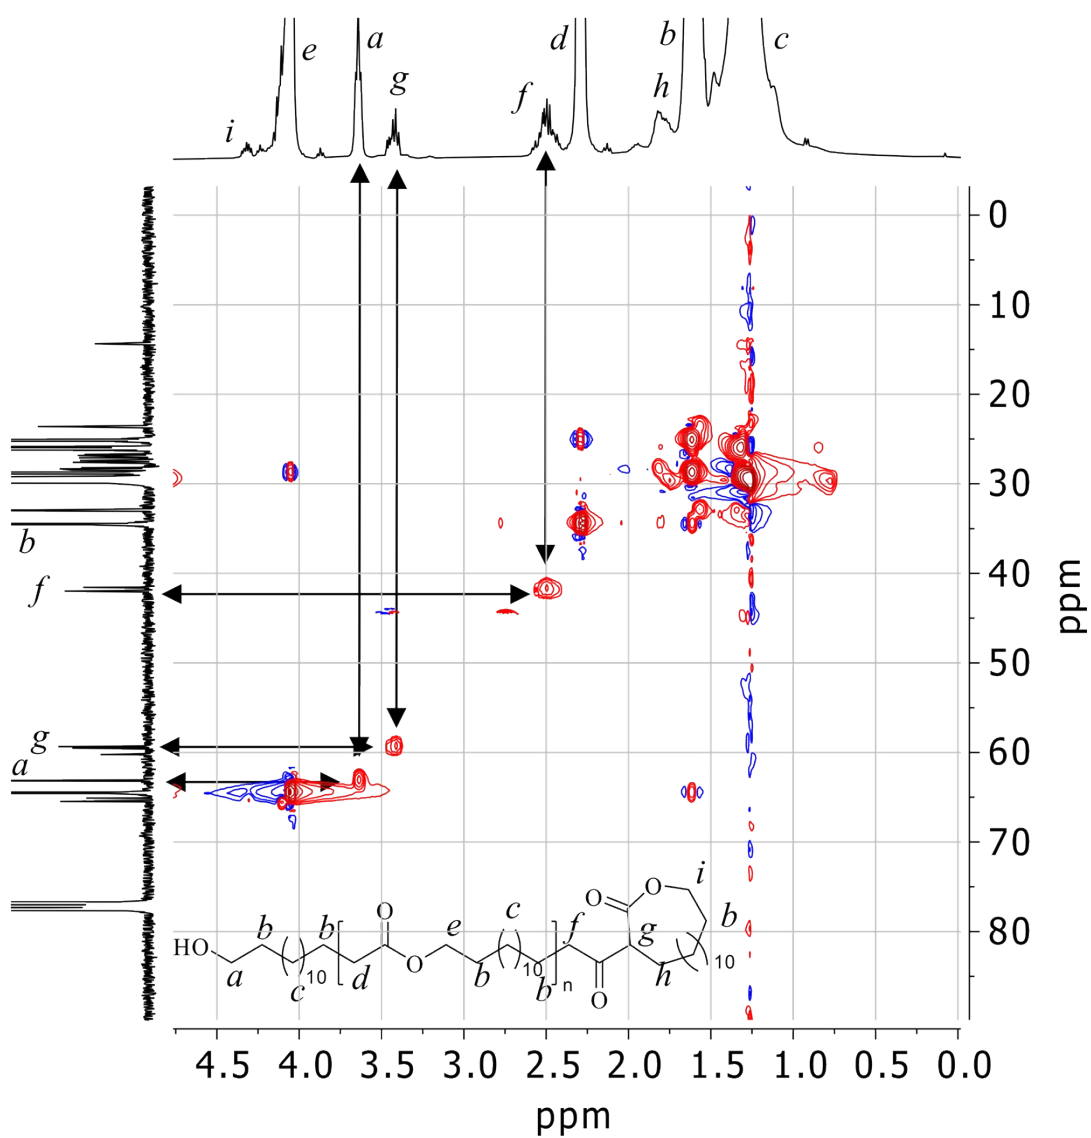

Figure S11.  $^1\text{H}$ - $^{13}\text{C}$  heteronuclear single quantum coherence (HSQC) NMR spectroscopy graph (400 MHz, 298 K,  $\text{CDCl}_3$ ) of low molecular PPDL synthesized by  $[\text{PDL}]/[\text{ZnEt}_2]/[\text{DBU}] = 15/1/2$  at 120  $^\circ\text{C}$  in toluene.

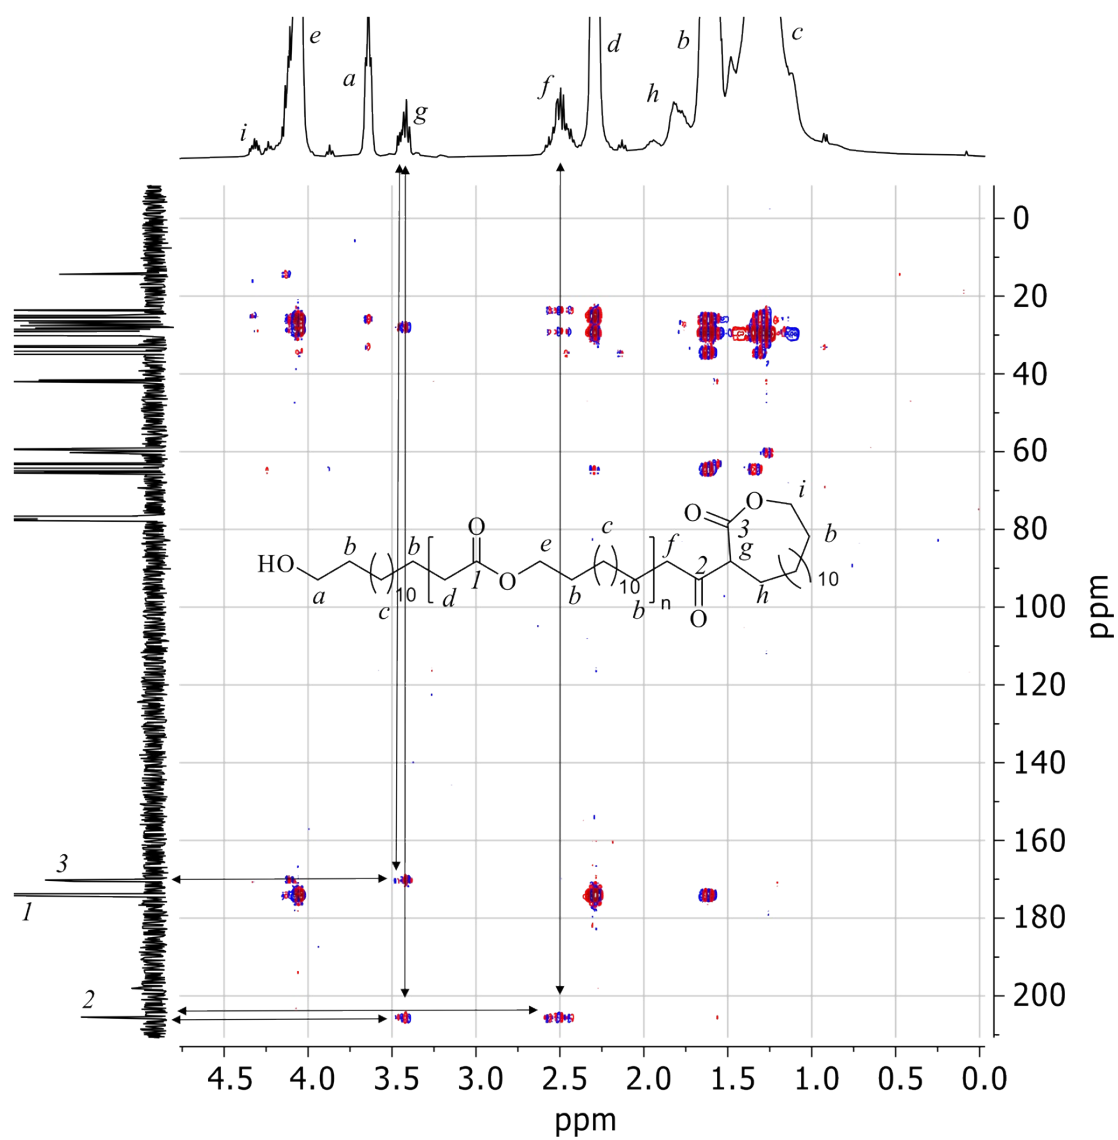

Figure S12.  $^1\text{H}$ - $^{13}\text{C}$  heteronuclear multiple-bond correlation (HMBC) NMR spectroscopy (400 MHz, 298 K,  $\text{CDCl}_3$ ) of PPDL synthesized by  $[\text{PDL}]/[\text{ZnEt}_2]/[\text{DBU}] = 15/1/2$  at 120  $^\circ\text{C}$  in toluene.

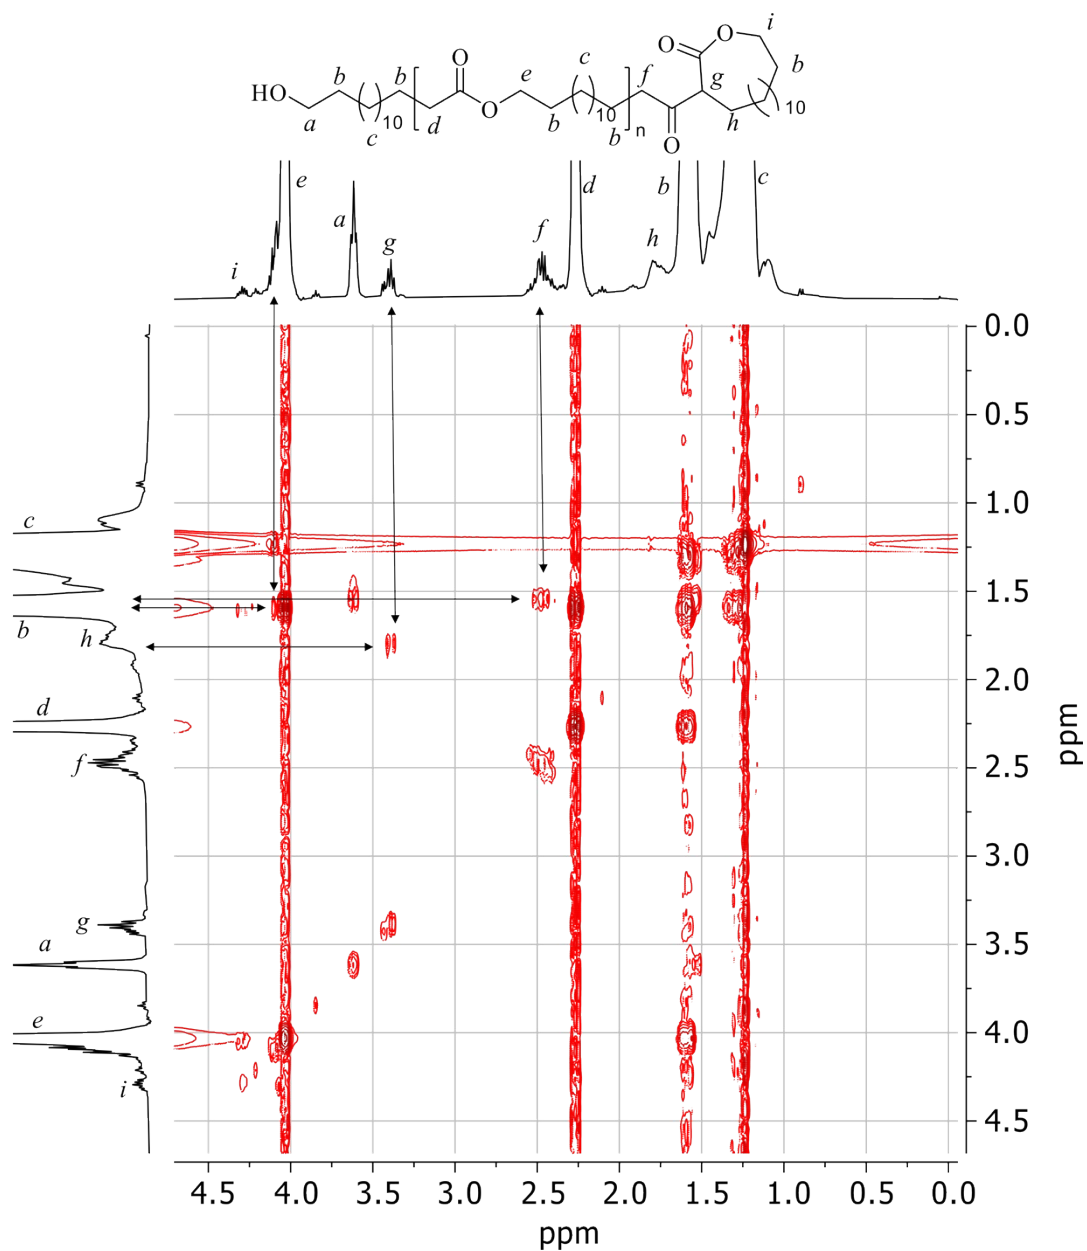

Figure S13.  $^1\text{H}$ - $^1\text{H}$  homonuclear correlation (COSY) NMR spectroscopy (400 MHz, 298 K,  $\text{CDCl}_3$ ) of PPDL synthesized by  $[\text{PDL}]/[\text{ZnEt}_2]/[\text{DBU}] = 15/1/2$  at 120 °C in toluene.

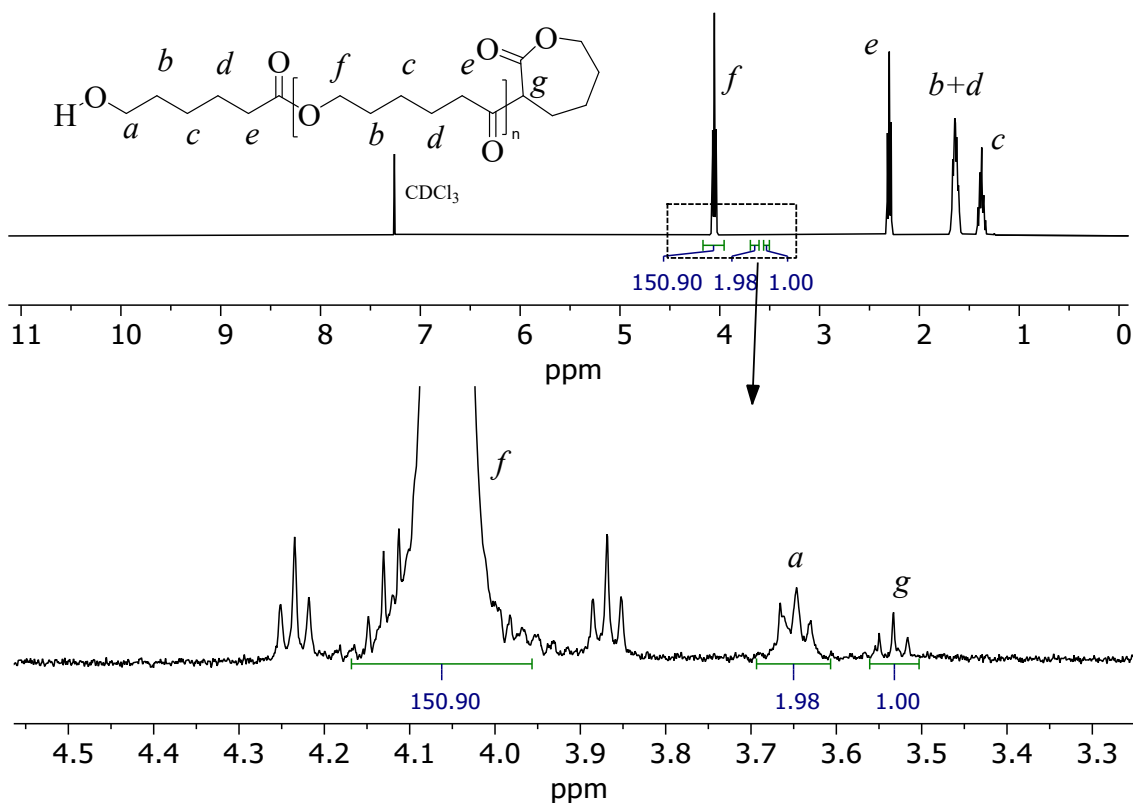

Figure S14.  $^1\text{H}$  NMR (400 MHz, 298 K,  $\text{CDCl}_3$ ) of PCL polymer synthesized by  $[\text{CL}]/[\text{ZnEt}_2] = 50/1$  at 120 °C in the absence of DBU.

Table S2. Polymer samples used for viscosity analysis.

| Catalyst                        | T (°C) | $M_{n,\text{theory}}$<br>( $\text{kg mol}^{-1}$ ) | $\text{DP}^a$ | $M_n$ ( $\text{kg mol}^{-1}$ ) <sup>a</sup> | $M_n$ ( $\text{kg mol}^{-1}$ ) <sup>b</sup> | $\mathcal{D}^b$ |
|---------------------------------|--------|---------------------------------------------------|---------------|---------------------------------------------|---------------------------------------------|-----------------|
| ZnEt <sub>2</sub> -DBU          | 120    | 8.7                                               | 32            | 7.7                                         | 24.5                                        | 1.86            |
| ZnEt <sub>2</sub> -DBU          | 120    | 11.4                                              | 43            | 9.4                                         | 37.1                                        | 1.89            |
| ZnEt <sub>2</sub> -DBU          | 120    | 22.4                                              | 73            | 17.5                                        | 72.5                                        | 1.60            |
| ZnEt <sub>2</sub> -DBU          | 120    | 33.5                                              | 114           | 27.4                                        | 102.5                                       | 1.75            |
| <sup>t</sup> BuOLi <sup>c</sup> | 120    | 12.0                                              | 50            | 12.0                                        | 42.5                                        | 1.79            |
| <sup>t</sup> BuOLi <sup>c</sup> | 120    | 18.0                                              | 78            | 18.7                                        | 70.5                                        | 1.78            |
| <sup>t</sup> BuOLi <sup>c</sup> | 120    | 29.1                                              | 120           | 28.8                                        | 97.6                                        | 1.70            |
| <sup>t</sup> BuOLi <sup>c</sup> | 120    | 33.6                                              | 140           | 33.7                                        | 117.1                                       | 1.67            |

<sup>a</sup>Determined by  $^1\text{H}$  NMR (400 MHz, 298 K,  $\text{CDCl}_3$ ).

<sup>b</sup>Determined by SEC analysis versus polystyrene standards (0.5 mL min<sup>-1</sup>, 3 mg mL<sup>-1</sup>,  $\text{CHCl}_3$ ).

<sup>c</sup>Used to generate PPDL of known linear topology.  $[\text{PDL}] = 2 \text{ M}$  in toluene treated with desired quantity <sup>t</sup>BuOLi and heated for 2 hours at 120 °C.

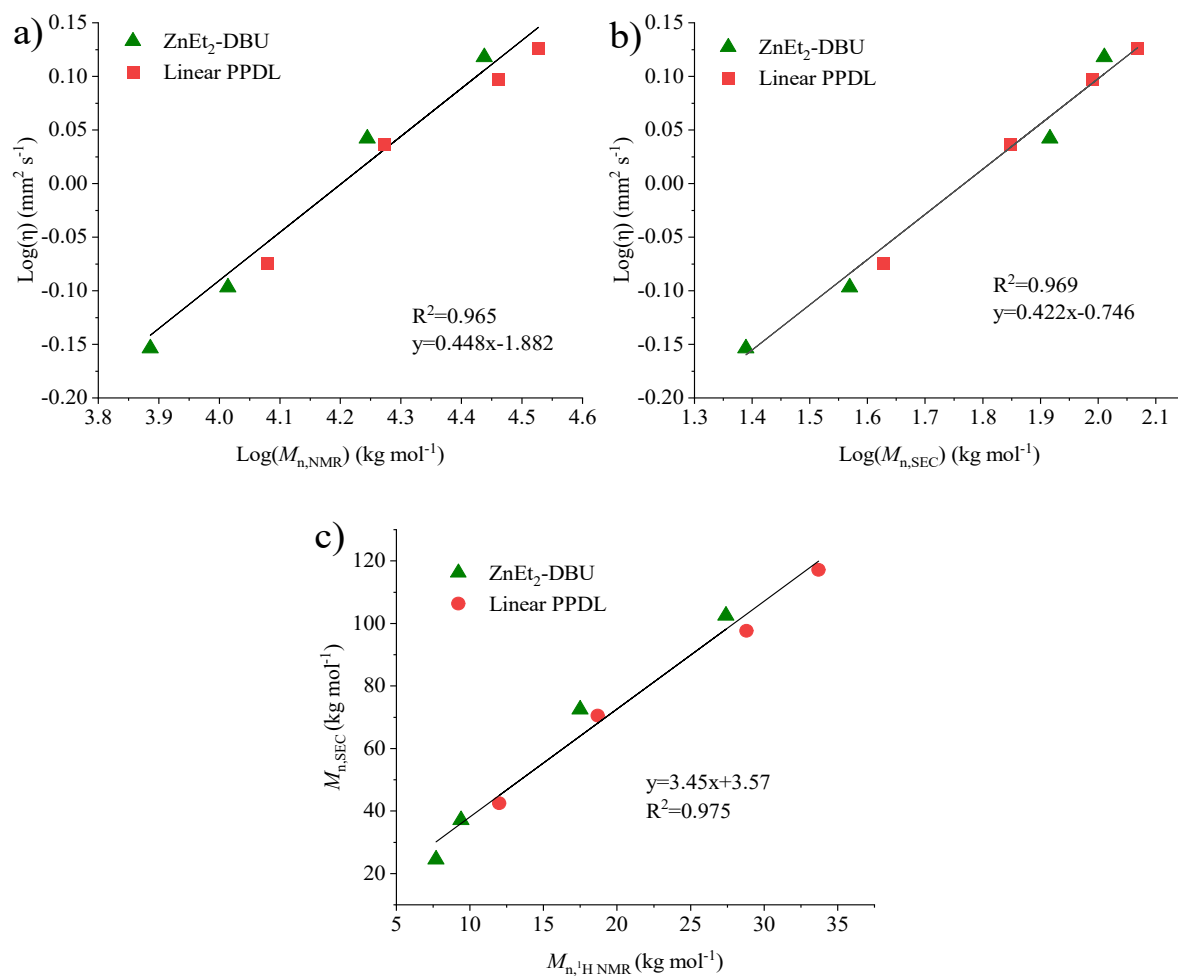

Figure S15. Viscometry (Ubbelohde,  $0.009582 \text{ mm}^2 \text{ s}^{-2}$ ,  $0.1 \text{ g mL}^{-1} \text{ CHCl}_3$ ) analysis of PPDL synthesized by  $\text{ZnEt}_2\text{-DBU}$  at  $120^\circ \text{C}$  compared to a linear PPDL sample synthesized by  $^t\text{BuOLi}$  anionic initiator at  $120^\circ \text{C}$ .  $M_n$  was derived a) by  $^1\text{H}$  NMR integration of the alcohol end group and ester repeating unit and b) from SEC versus polystyrene standards.



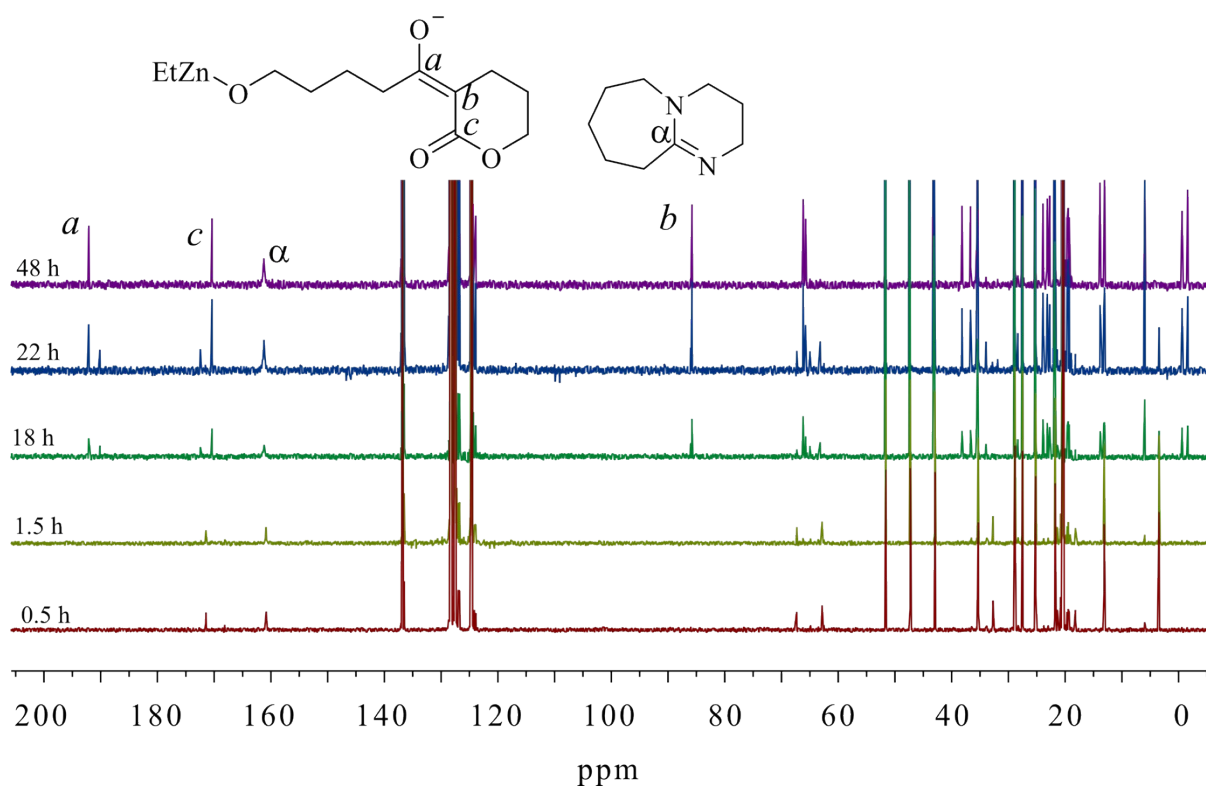

Figure S16. In-situ  $^{13}\text{C}$  NMR (101 MHz, 298 K, toluene) analysis of the reaction of  $[\delta\text{VL}]/[\text{ZnEt}_2]/[\text{DBU}] = 1/1/2$  in toluene at room temperature over time.

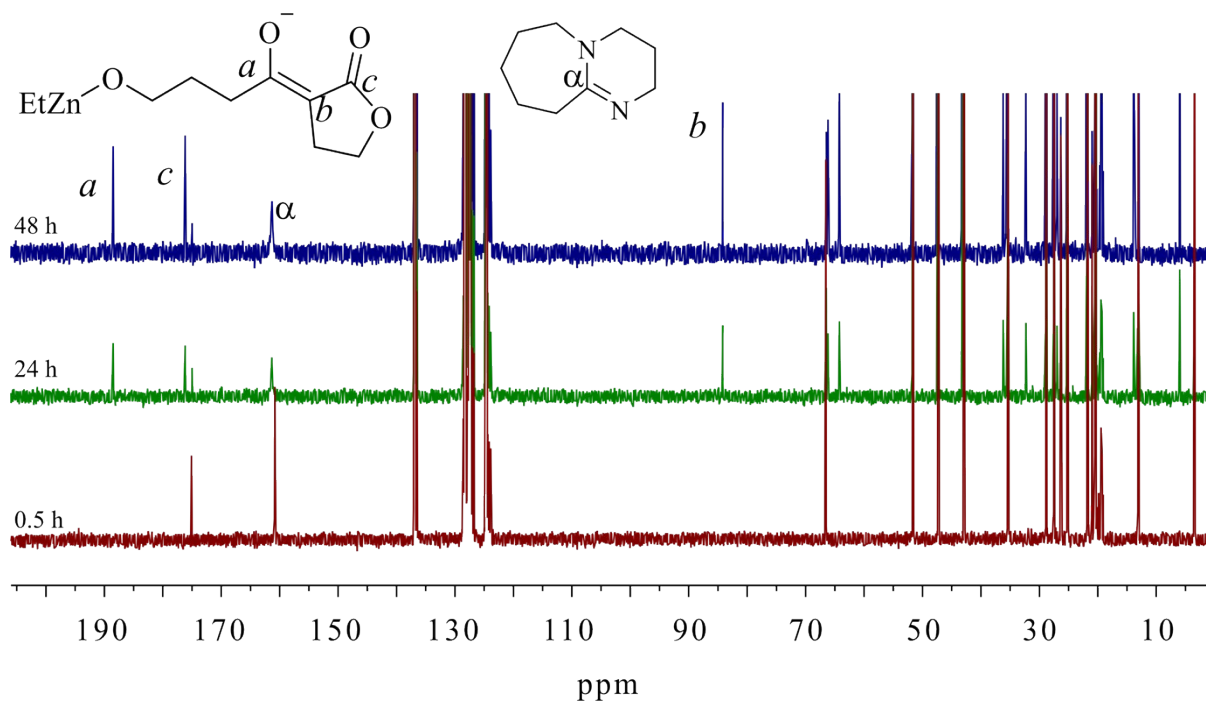

Figure S17. In-situ  $^{13}\text{C}$  NMR (101 MHz, 298 K, toluene) analysis of the reaction of  $[\gamma\text{BL}]/[\text{ZnEt}_2]/[\text{DBU}] = 1/1/2$  in toluene at room temperature over time.

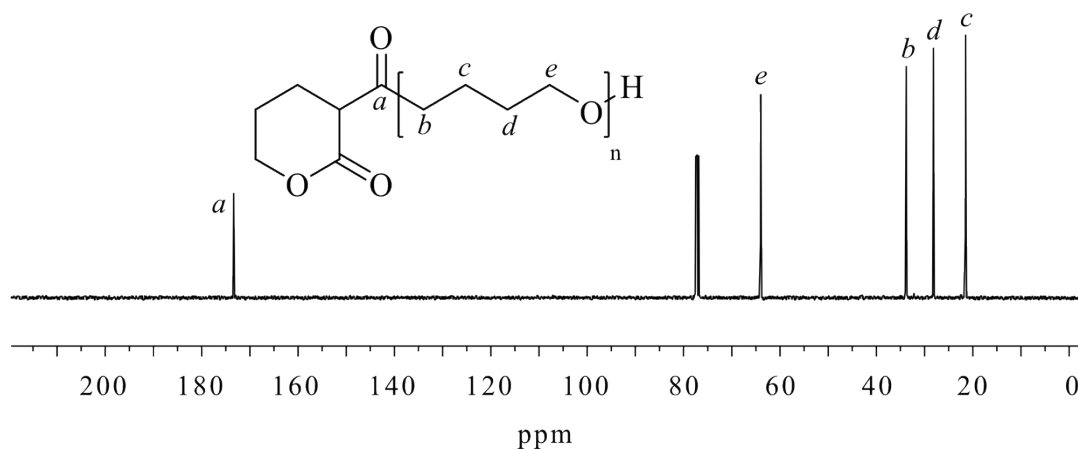

Figure S18.  $^{13}\text{C}$  NMR (101 MHz, 298 K,  $\text{CDCl}_3$ ) analysis of  $P(\delta\text{VL})$  synthesized by  $[\delta\text{VL}]/[\text{ZnEt}_2]/[\text{DBU}] = 50/1/2$  in toluene  $[\delta\text{VL}]_0 = 2 \text{ M}$  at room temperature after 18 hours and obtained by precipitation in heptane.

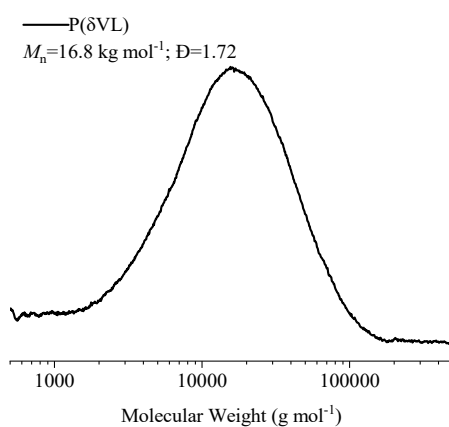

Figure S19. SEC elugram ( $\text{CHCl}_3$ ) of  $P(\delta\text{VL})$  synthesized by  $[\delta\text{VL}]/[\text{ZnEt}_2]/[\text{DBU}] = 50/1/2$  in toluene  $[\delta\text{VL}]_0 = 2 \text{ M}$  at room temperature after 18 hours and obtained by precipitation in heptane.

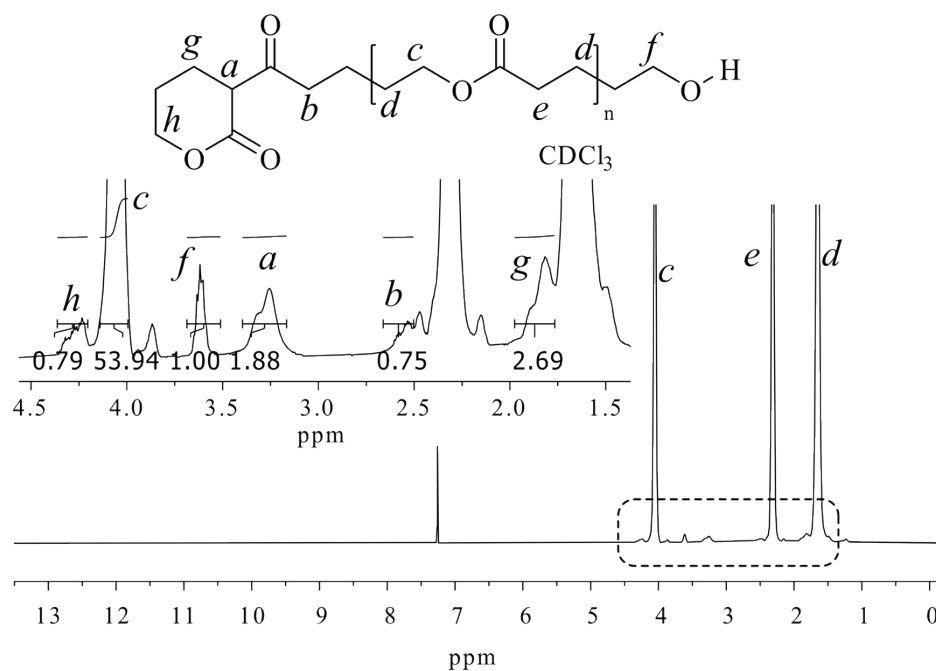

Figure S20.  $^1\text{H}$  NMR (400 MHz, 298 K,  $\text{CDCl}_3$ ) analysis of  $P(\delta\text{VL})$  synthesized by  $[\delta\text{VL}]/[\text{ZnEt}_2]/[\text{DBU}] = 50/1/2$  in toluene  $[\delta\text{VL}]_0 = 2 \text{ M}$  at room temperature after 18 hours and obtained by precipitation in heptane.

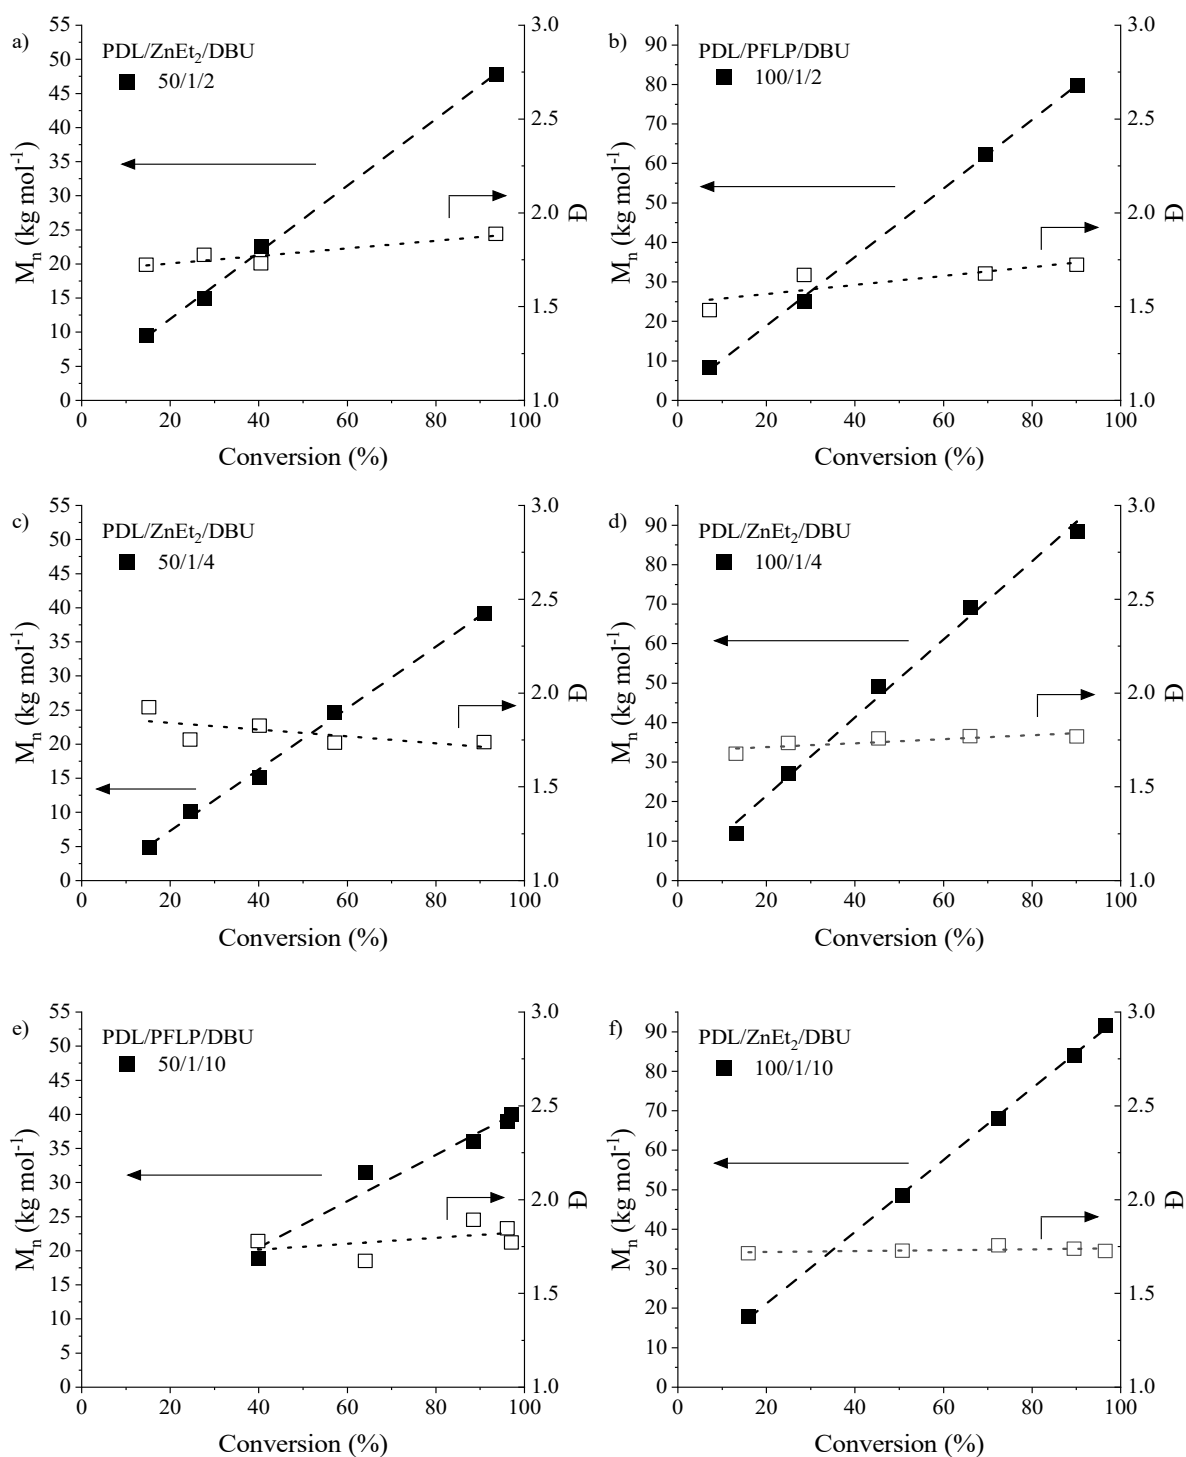

Figure S21. Number average molecular weight and dispersity to conversion of PPDL synthesized using ratios of ZnEt<sub>2</sub> to DBU ranging from 2 to 10. Conditions: [PDL] = 2 M in toluene at 90 °C. Reported values were obtained by SEC in CHCl<sub>3</sub> at a flow rate of 0.5 mL min<sup>-1</sup> versus narrow disperse polystyrene standards.

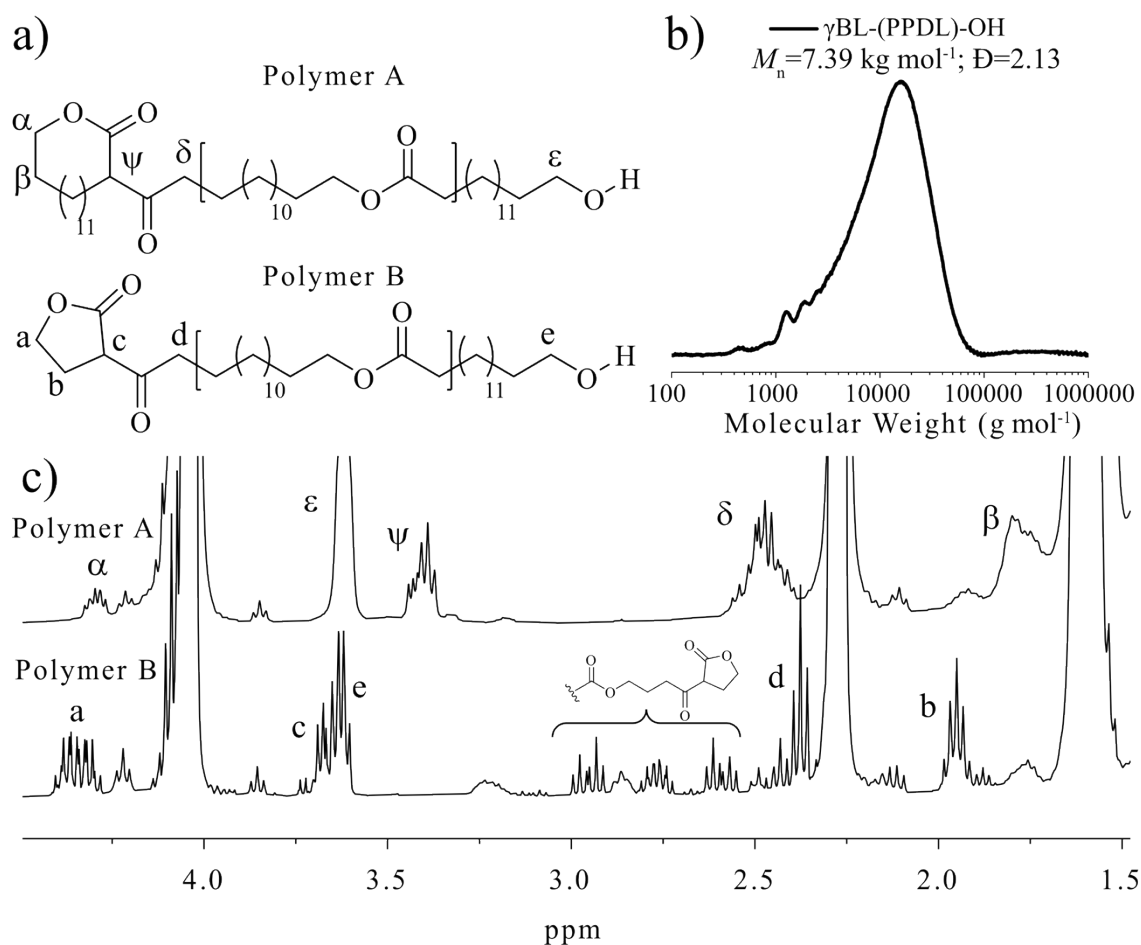

Figure S22. Low molecular weight PPDL synthesized by  $[\text{PDL}]/[\text{ZnEt}_2]/[\text{DBU}]/[\gamma\text{BL}] = 10/1/2/3$  with  $[\text{PDL}]_0 = 1.9 \text{ M}$  in toluene after heating to  $90 \text{ }^\circ\text{C}$  for 1 hour. Polymer was obtained by dissolution in  $\text{CHCl}_3$  and precipitation in  $\text{MeOH}$  ( $2\times$ ). a) chemical structure of polymers synthesized in the absence (Polymer A) of  $\gamma\text{BL}$  and presence (Polymer B) of  $\gamma\text{BL}$ . b) SEC elugram ( $\text{CHCl}_3$ ) of the synthesized PPDL. c)  $^1\text{H}$  NMR (298K, 400 MHz,  $\text{CDCl}_3$ ) of polymers A and B shown in 4a.

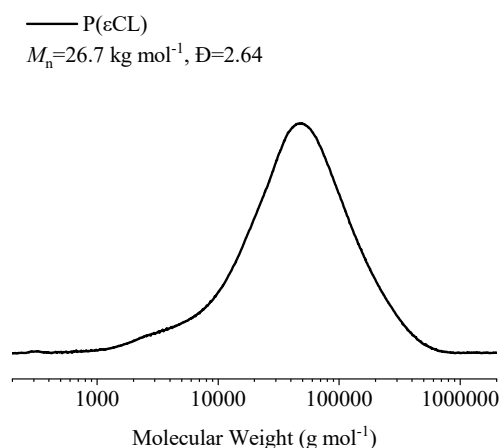

Figure 23. SEC elugram ( $\text{CHCl}_3$ ) of  $\text{P}(\epsilon\text{CL})$  synthesized by  $[\epsilon\text{CL}]/[\text{ZnEt}_2]/[\text{DBU}] = 50/1/2$  in toluene  $[\epsilon\text{CL}]_0 = 2 \text{ M}$  at room temperature after 18 hours and obtained by precipitation in heptane
